# Supplementary material for: Reversible single-crystal to single-crystal photoreaction between a coordination comb and a ladder displays photo-switchable fluorescence
Source: Royal Society of Chemistry journal article supplement (doi:10.1039/d4qi02162b), 2024-01-01
Supplement: d4qi02162b1.pdf [file d4qi02162b1.pdf]

## Electronic Supplementary Information (ESI†)

### Reversible single-crystal to single-crystal photoreaction between a coordination comb and a ladder displays photo-switchable fluorescence

Ni-Ya Li,<sup>a</sup> Xin-Yu Wang,<sup>a</sup> Pei-Xuan Zhang,<sup>a</sup> Ning-Ning Zou,<sup>a</sup> Wen Qiu,<sup>a</sup> Yu-Fei Xing,<sup>a</sup> Yun-Jian Wang,<sup>\*b</sup> Xiao-Yan Tang<sup>\*c</sup> and Dong Liu<sup>\*a</sup>

---

<sup>a.</sup> Jiangsu Key Laboratory for Chemistry of Low-Dimensional Materials, School of Chemistry and Chemical Engineering, Huaiyin Normal University, Huaian 223300, Jiangsu, P. R. China. E-mail: dongliu@hytc.edu.cn

<sup>b.</sup> Key Laboratory of Green and Precise Synthetic Chemistry and Applications, Ministry of Education; School of Chemistry and Materials Science, Huaibei Normal University, Huaibei 235000, P.R. China. E-mail: wangyunjianmail@163.com

<sup>c.</sup> School of Materials Engineering, Changshu Insititute of Technology, Changshu 215500, Jiangsu, PR China. E-mail: tangxy@cslg.edu.cn

---

## Table of Contents

|                                                                                                                                                                                                |     |
|------------------------------------------------------------------------------------------------------------------------------------------------------------------------------------------------|-----|
| <b>Table S1</b> Selected Bond Lengths (Å) and Angles (°) for <b>1</b> and <b>1a</b> .....                                                                                                      | S3  |
| <b>Fig. S1</b> View of the coordination environment of Zn1 in <b>1</b> with labeling scheme. ....                                                                                              | S4  |
| <b>Fig. S2</b> SEM and element mapping images of <b>1</b> . ....                                                                                                                               | S5  |
| <b>Fig. S3</b> Illumination intensity of sunlight and UV light in the range of 290-390 nm every 30 s within 10 min during the sunlight-induced [2+2] cycloaddition reaction of <b>1</b> . .... | S6  |
| <b>Fig. S4</b> The <sup>1</sup> H NMR spectra of <b>1</b> and <b>1a</b> . ....                                                                                                                 | S7  |
| <b>Fig. S5</b> The <sup>1</sup> H NMR spectra of the sample of <b>1</b> upon irradiation of UV light with the wavelengths of 254 nm, 320 nm and 365 nm, respectively. ....                     | S8  |
| <b>Fig. S6</b> The UV-vis absorption spectra of <b>1</b> and <b>1a</b> in ethanol. ....                                                                                                        | S10 |
| <b>Fig. S7</b> Optical micrographs of single crystals of <b>1</b> before (a) and after (b) photoreaction. ....                                                                                 | S10 |
| <b>Fig. S8</b> View of the coordination environment of Zn1 in <b>1a</b> with labeling scheme. ..                                                                                               | S11 |
| <b>Fig. S9</b> PXRD patterns of <b>1</b> and <b>1a</b> . ....                                                                                                                                  | S12 |
| <b>Fig. S10</b> PXRD pattern of regenerated <b>1</b> . ....                                                                                                                                    | S13 |
| <b>Fig. S11</b> The <sup>1</sup> H NMR spectrum of regenerated <b>1</b> . ....                                                                                                                 | S13 |
| <b>Fig. S12</b> The UV-vis absorption spectrum of regenerated <b>1</b> in ethanol. ....                                                                                                        | S14 |
| <b>Fig. S13</b> The TGA curves for <b>1</b> and <b>1a</b> . ....                                                                                                                               | S15 |
| <b>Fig. S14</b> Solid state emission spectra of <b>1</b> and <b>1a</b> and 2,3-ppe ligand. ....                                                                                                | S16 |
| <b>Fig. S15</b> The reaction reversibility for solid state emission spectra of <b>1</b> . ....                                                                                                 | S17 |
| <b>Fig. S16</b> LSCM fluorescence images of a carved pattern with powdered sample of regenerated <b>1</b> and <b>1a</b> . ....                                                                 | S18 |

**Table S1** Selected Bond Lengths (Å) and Angles (°) for **1** and **1a**

| Compound <b>1</b>  |            |                  |            |
|--------------------|------------|------------------|------------|
| Zn(1)-O(1)         | 1.9581(15) | Zn(1)-O(4A)      | 1.9719(15) |
| Zn(1)-O(5)         | 1.9993(18) | Zn(1)-N(1)       | 2.0256(17) |
| O(1)-Zn(1)-O(4A)   | 103.40(6)  | O(1)-Zn(1)-O(5)  | 108.20(8)  |
| O(4A)-Zn(1)-O(5)   | 105.11(8)  | O(1)-Zn(1)-N(1)  | 118.43(7)  |
| O(4A)-Zn(1)-N(1)   | 110.48(7)  | O(5)-Zn(1)-N(1)  | 110.26(8)  |
| Compound <b>1a</b> |            |                  |            |
| Zn(1)-O(4A)        | 1.971(2)   | Zn(1)-O(1)       | 1.974(2)   |
| Zn(1)-O(5)         | 2.011(2)   | Zn(1)-N(1)       | 2.023(2)   |
| O(4A)-Zn(1)-O(1)   | 102.43(9)  | O(4A)-Zn(1)-O(5) | 112.45(10) |
| O(1)-Zn(1)-O(5)    | 104.37(10) | O(4A)-Zn(1)-N(1) | 120.03(10) |
| O(1)-Zn(1)-N(1)    | 107.37(9)  | O(5)-Zn(1)-N(1)  | 108.73(10) |

Symmetry codes: for **1**: (A)  $x, y - 1, z$ . for **1a**: (A)  $x, y - 1, z$ .

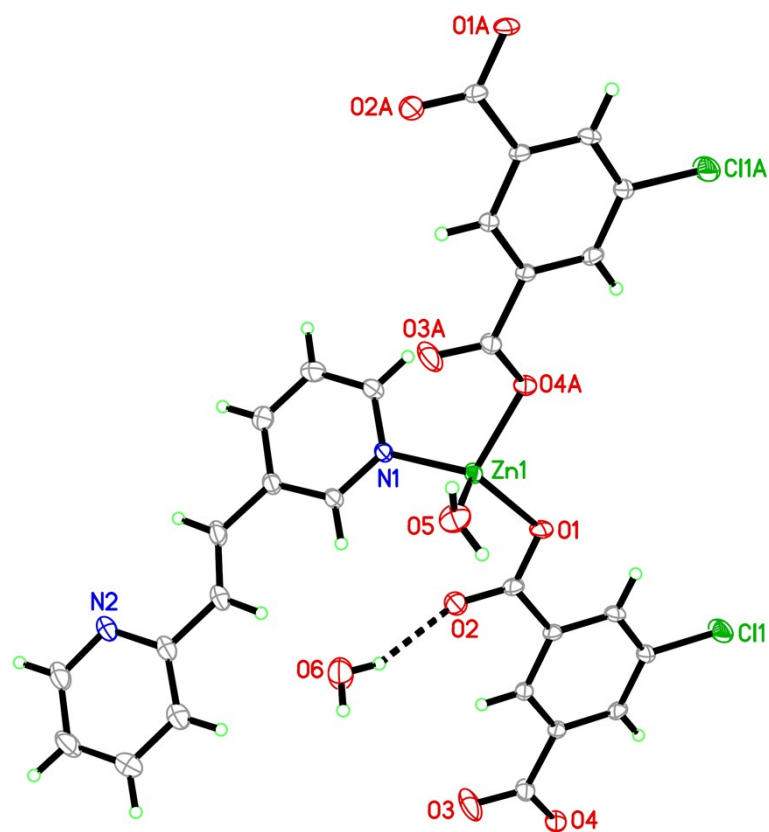

**Fig. S1.** View of the coordination environment of Zn1 in **1** with labeling scheme.

Symmetry codes: (A)  $x, y - 1, z$ .

(a)

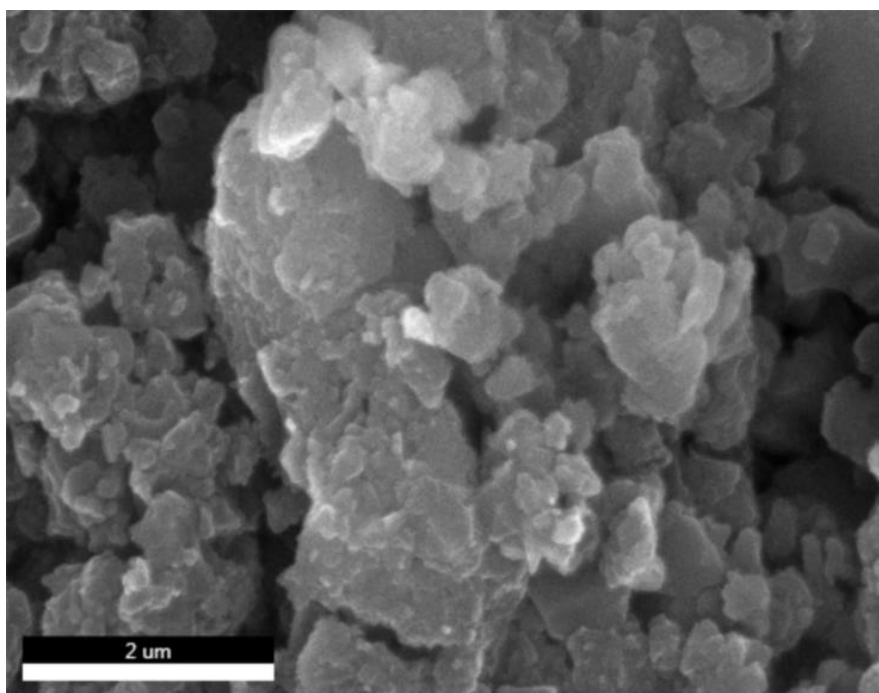

(b)

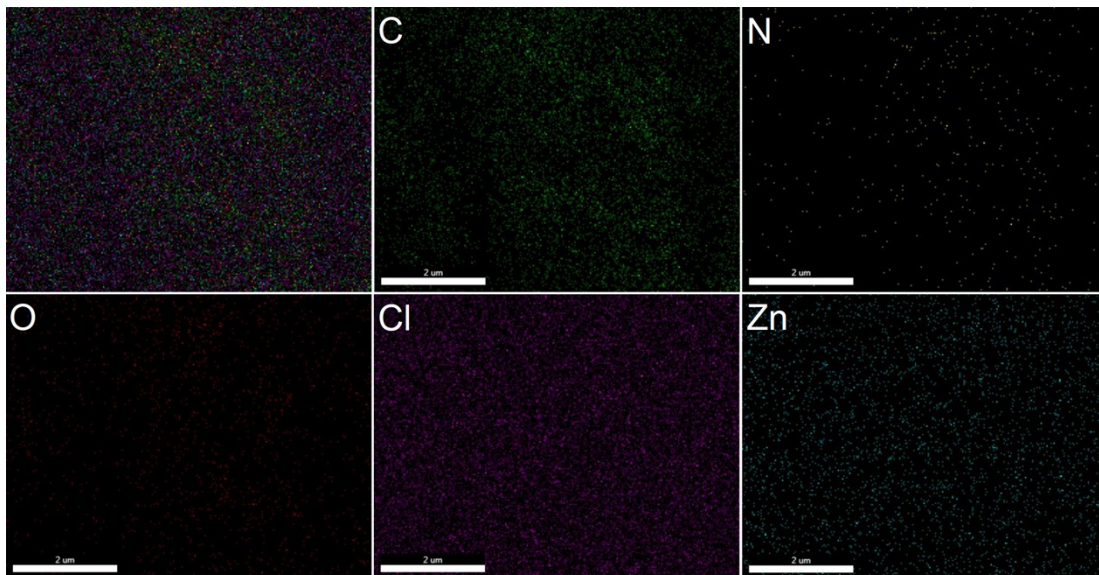

**Fig. S2.** (a) SEM image of **1** at 2 μm scale. (b) Element mapping images of **1**.

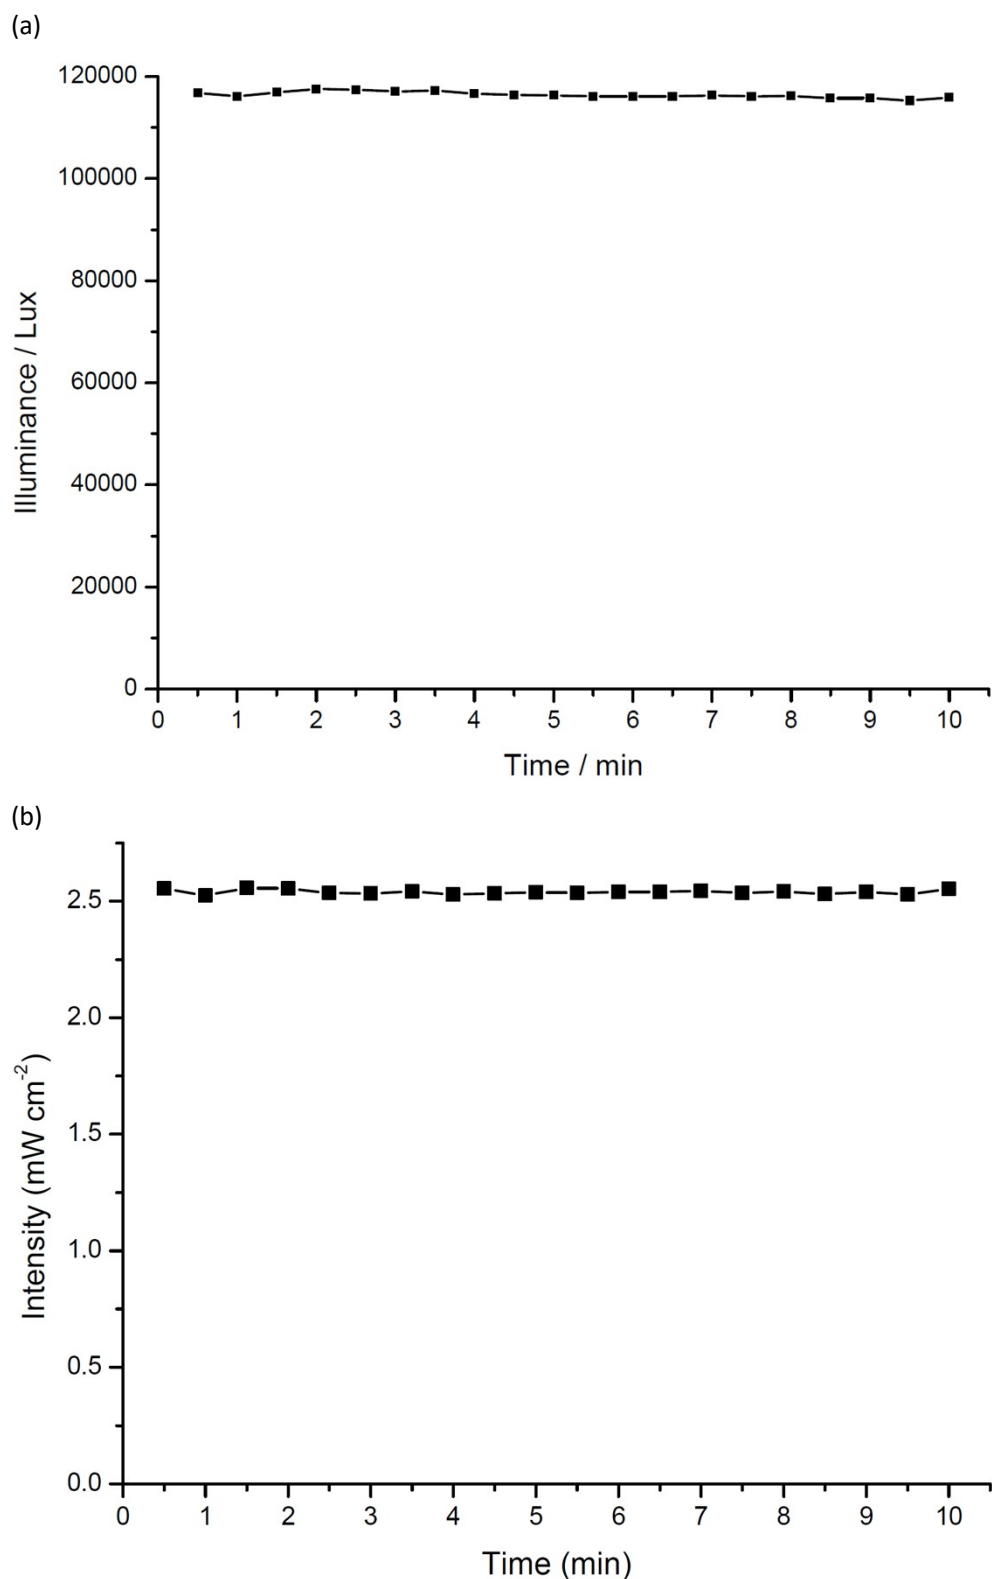

**Fig. S3. (a)** Illumination intensity of sunlight every 30 s within 10 min during the sunlight-induced [2+2] cycloaddition reaction of **1**. **(b)** Irradiation intensity of UV light in the range of 290-390 nm every 30 s within 10 min during the sunlight-induced [2+2] cycloaddition reaction of **1**.

(a)

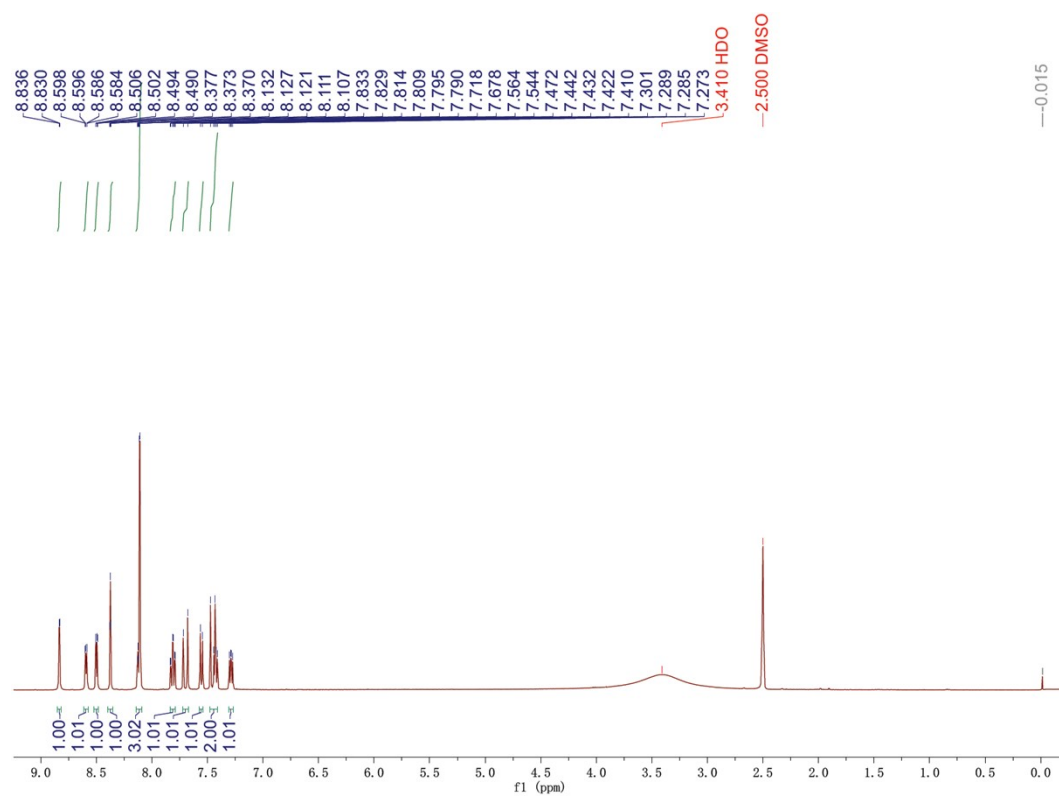

(b)

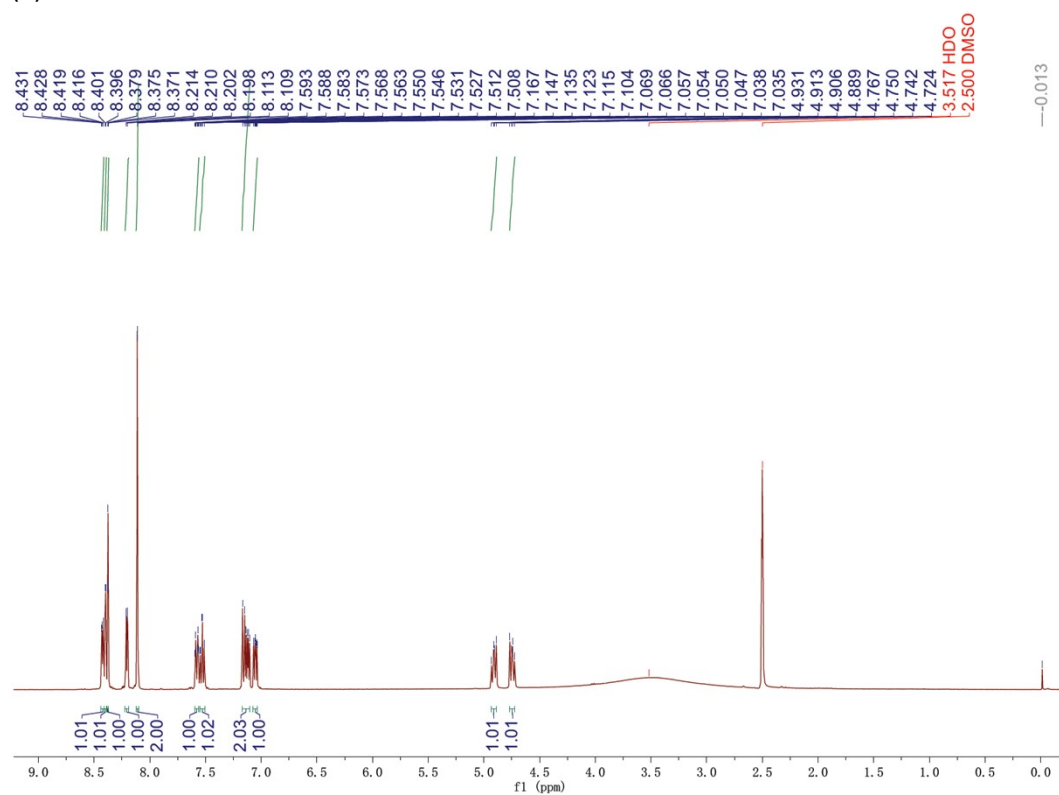

**Fig. S4.** The <sup>1</sup>H NMR spectra of **1** (a) and **1a** (b).

(a)

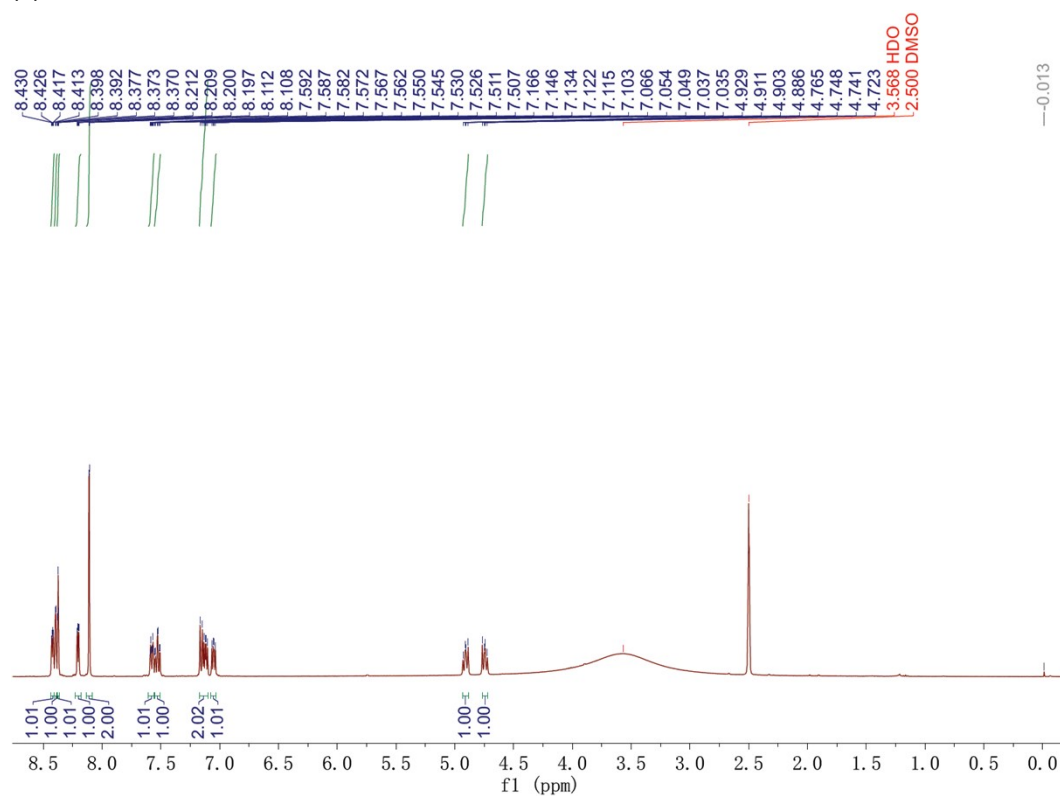

(b)

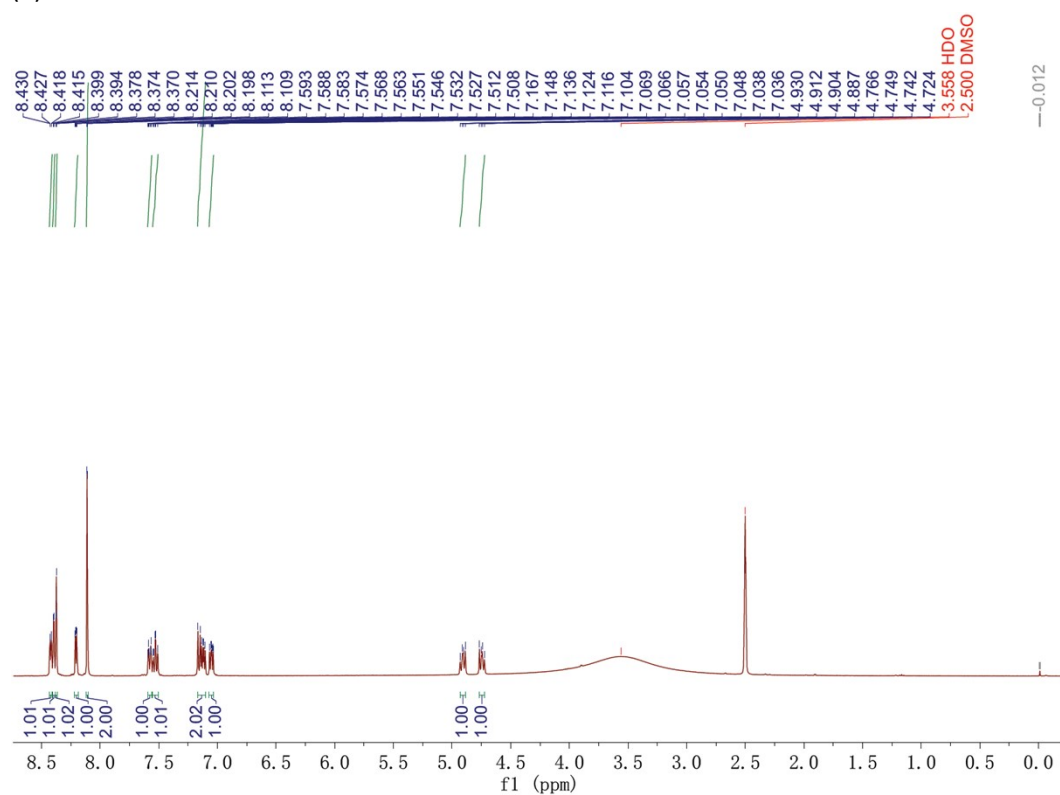



(c)

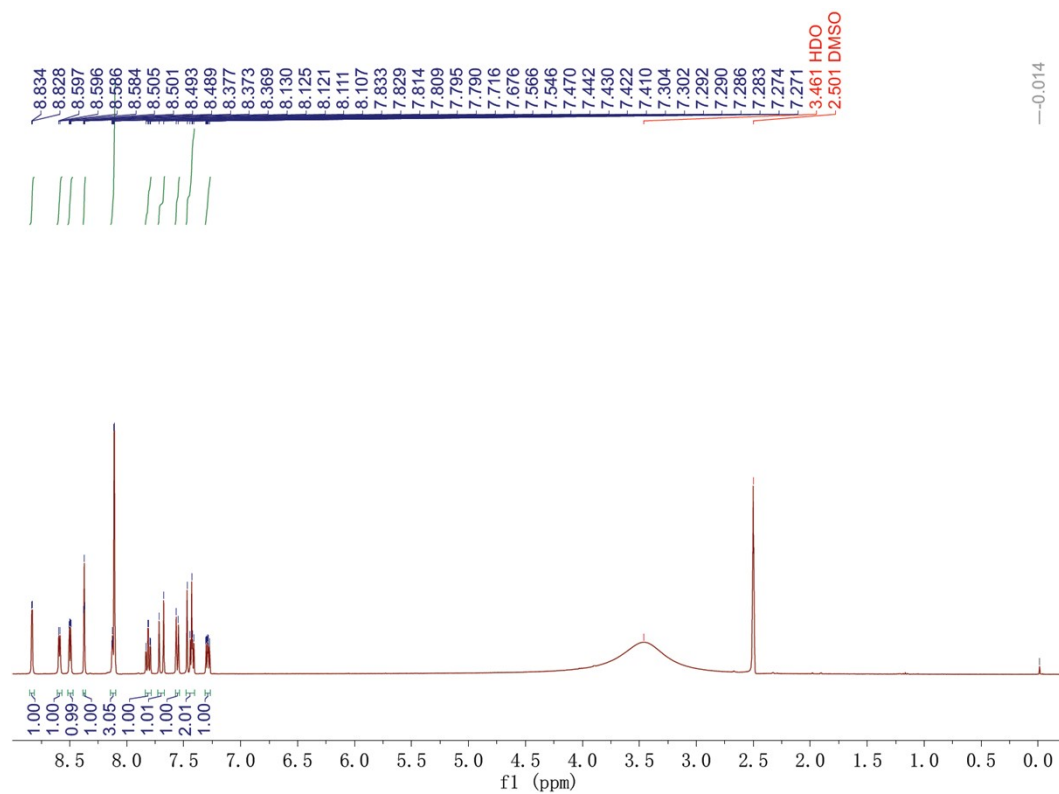

**Fig. S5.** (a) The  $^1\text{H}$  NMR spectrum of the sample of **1** upon irradiation of 365 nm UV light in 5min. (b) The  $^1\text{H}$  NMR spectrum of the sample of **1** upon irradiation of 320 nm UV light in 3 min. (c) The  $^1\text{H}$  NMR spectrum of the sample of **1** upon irradiation of 254 nm UV light in 5min.

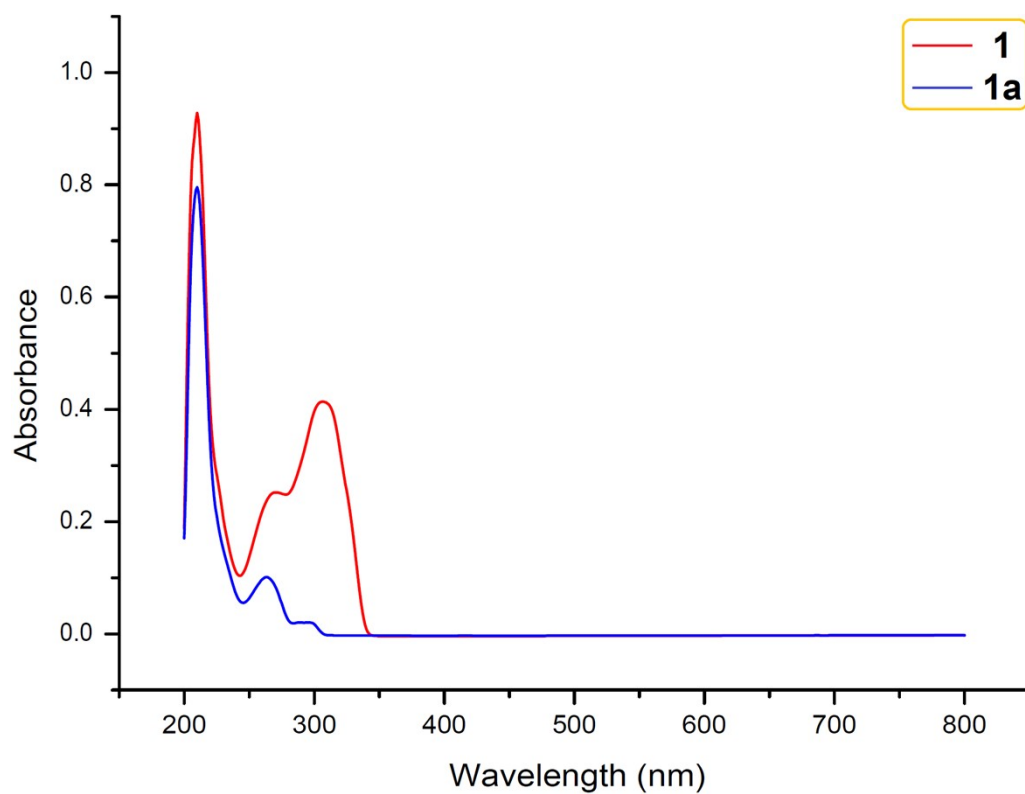

**Fig. S6.** The UV-vis absorption spectra of **1** and **1a** in ethanol.

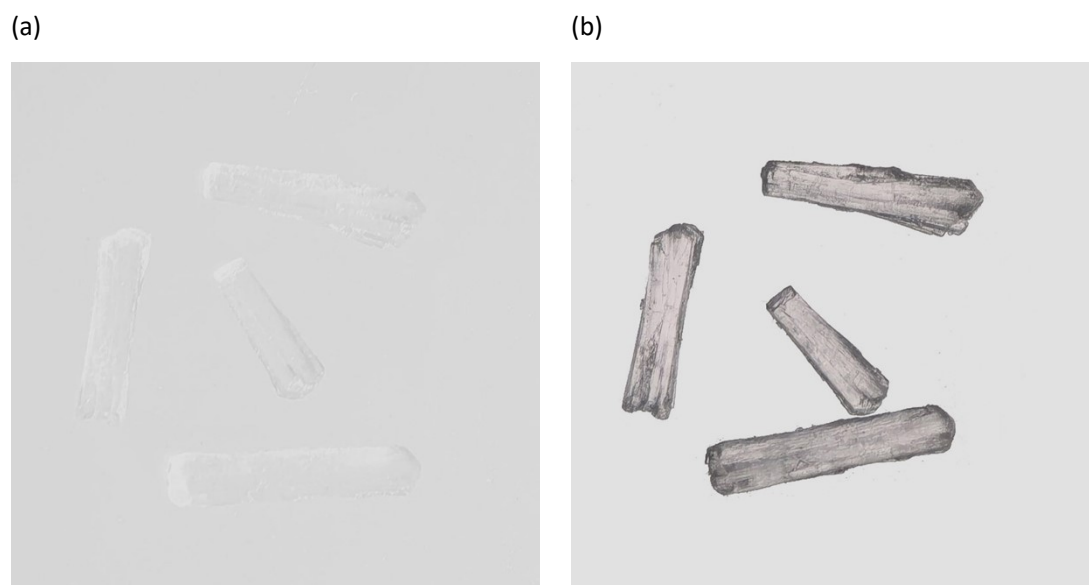

**Fig. S7.** Optical micrographs of single crystals of **1** before (a) and after (b) photoreaction.

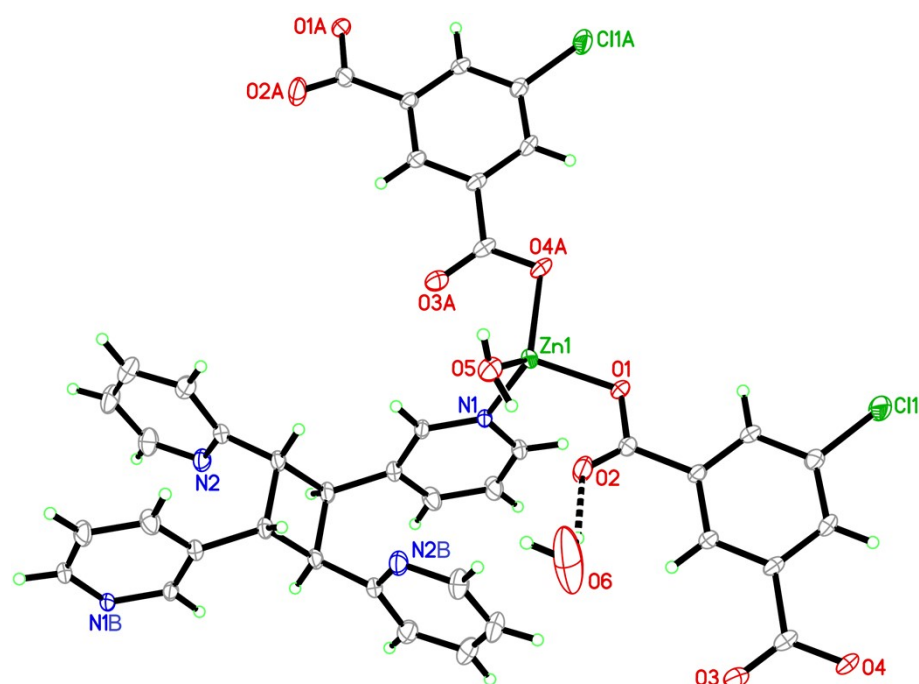

**Fig. S8.** View of the coordination environment of Zn1 in **1a** with labeling scheme.

Symmetry codes: (A)  $x, y - 1, z$ .

(a)

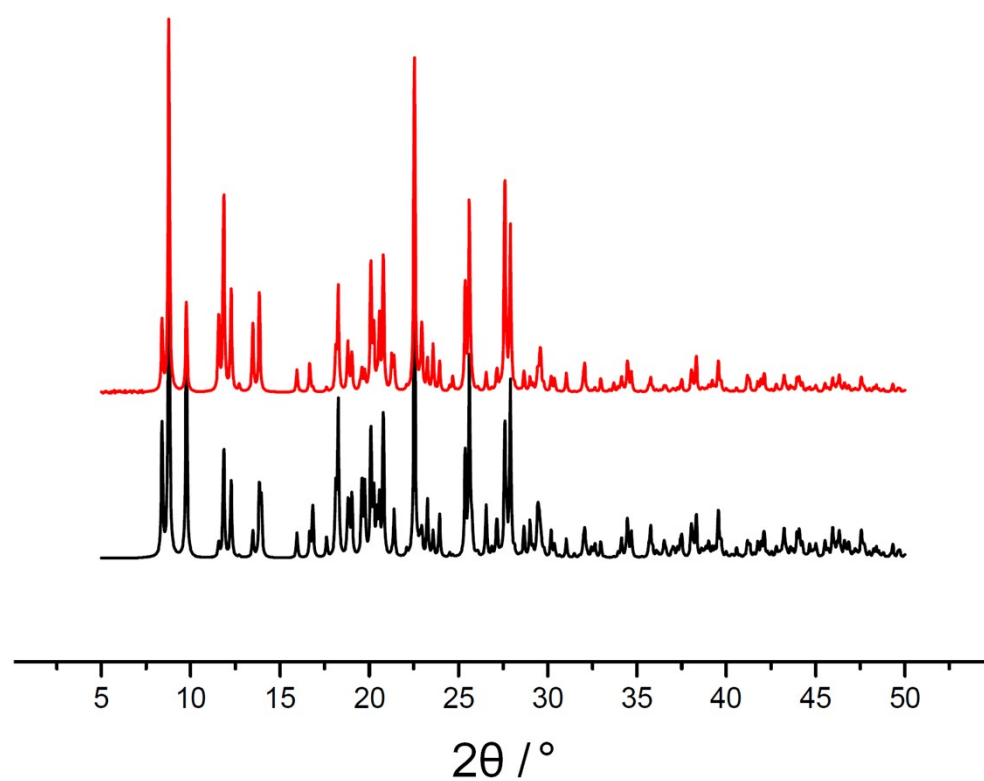

(b)

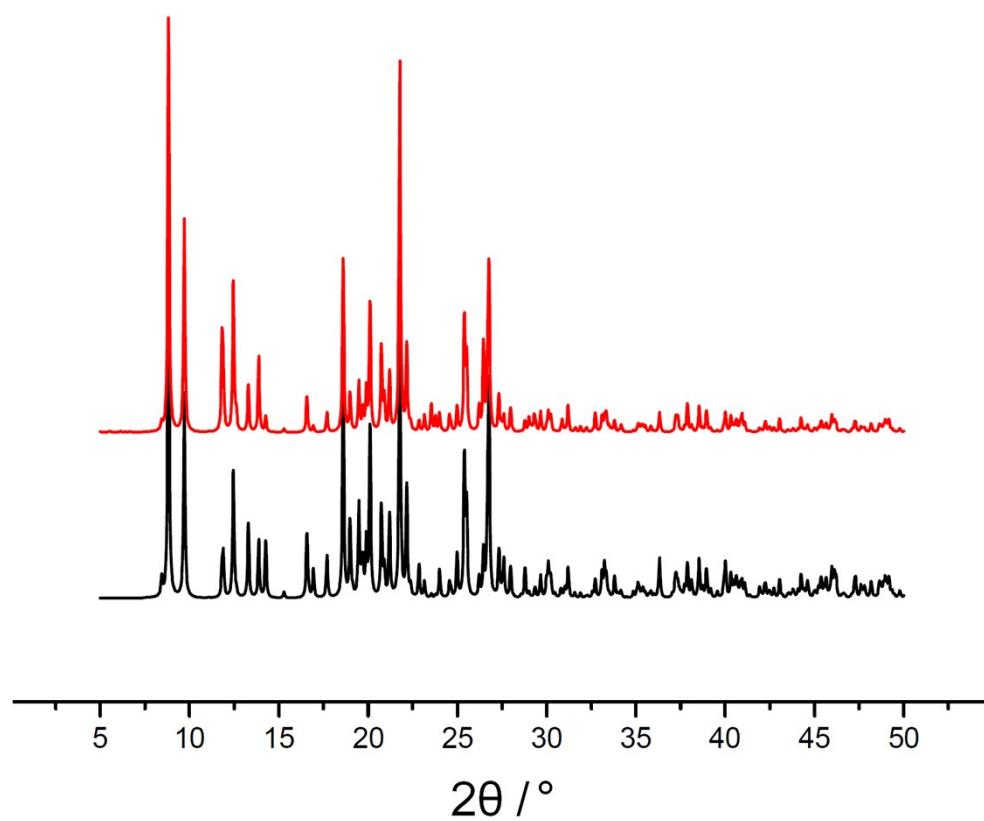

**Fig. S9.** PXRD patterns of **1** (a) and **1a** (b). Simulated patterns from single crystal: black; experimental patterns from grinding crystals: red.

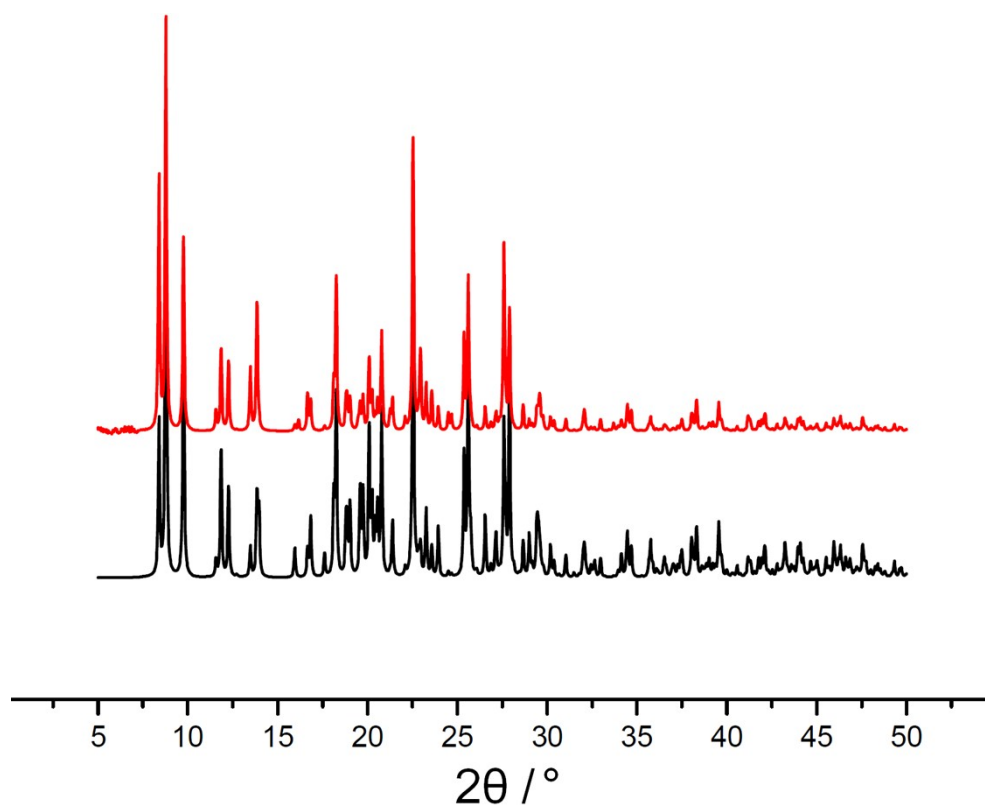

**Fig. S10.** PXRD pattern of regenerated **1** (simulated pattern from single crystal: black; experimental pattern from grinding crystals: red).

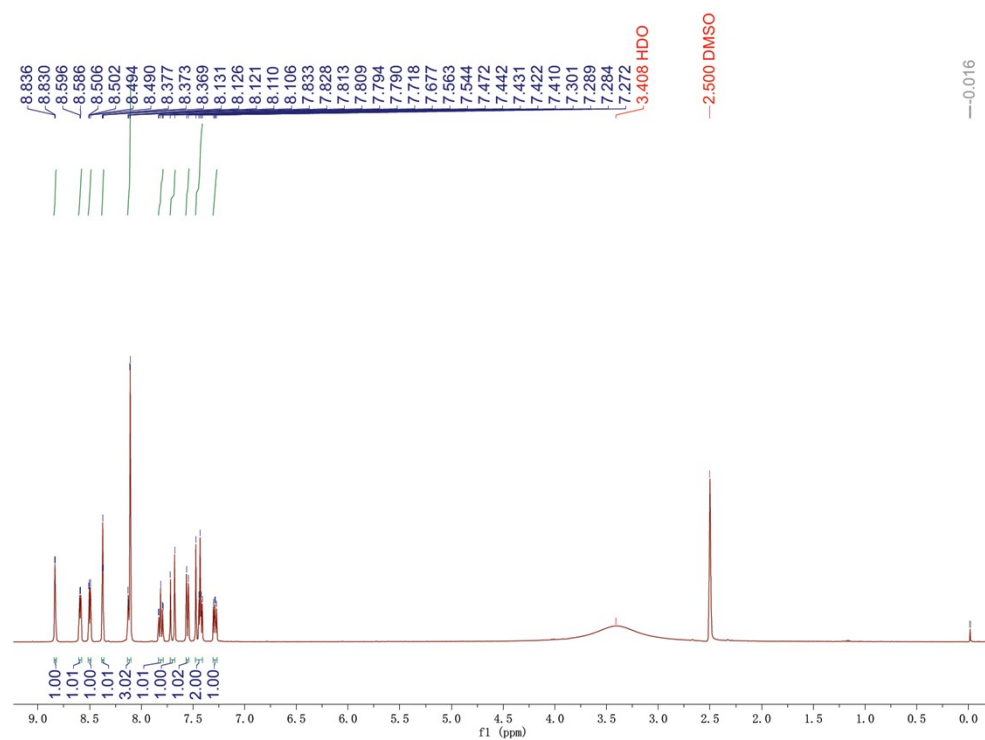

**Fig. S11.** The  $^1\text{H}$  NMR spectrum of regenerated **1**.

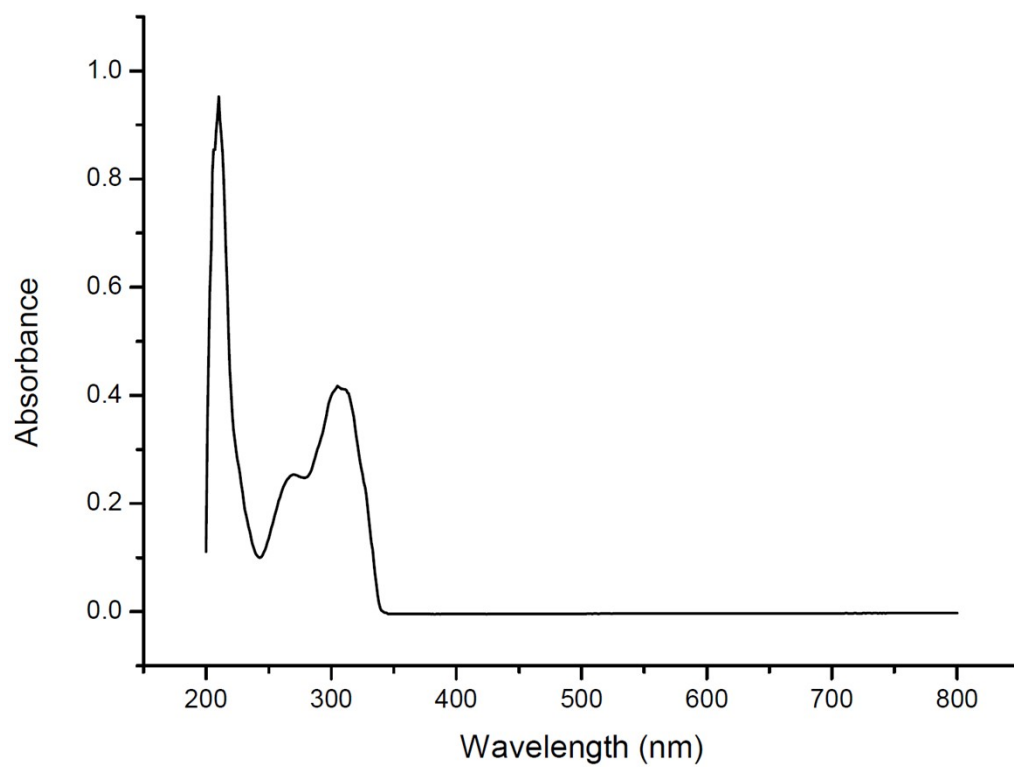

**Fig. S12.** The UV-vis absorption spectrum of regenerated **1** in ethanol.

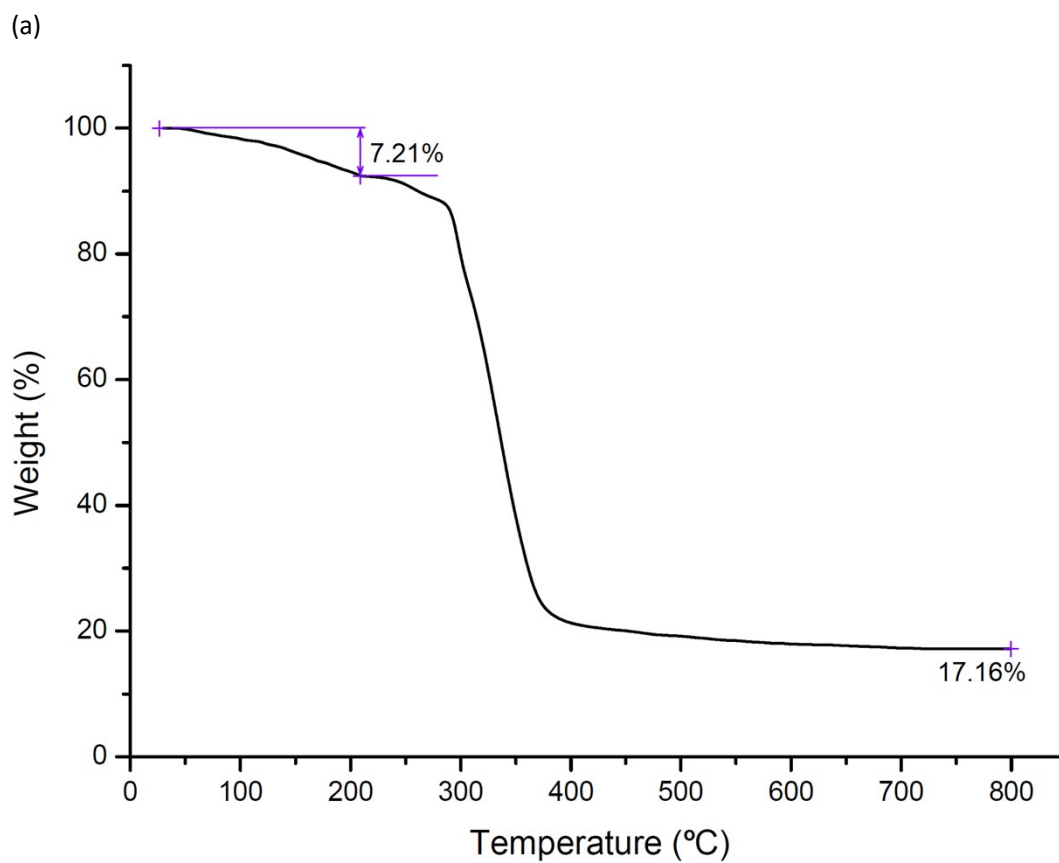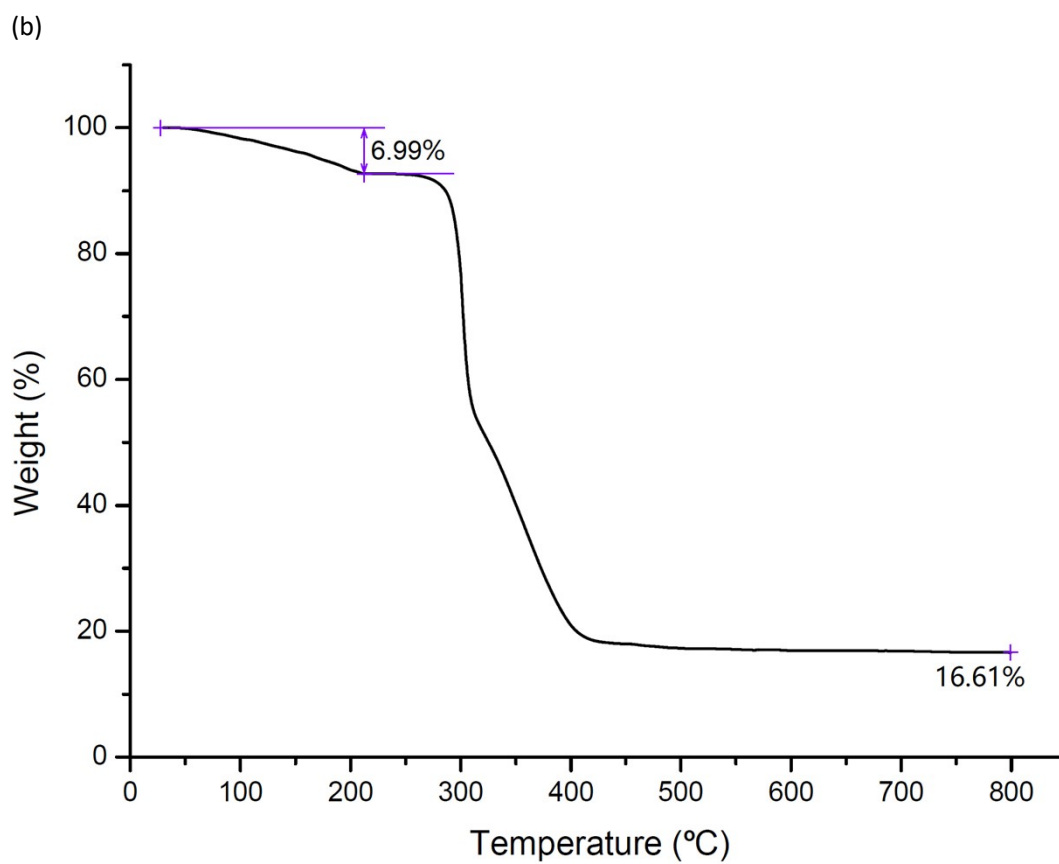

**Fig. S13.** The TGA curves for **1** (a) and **1a** (b).

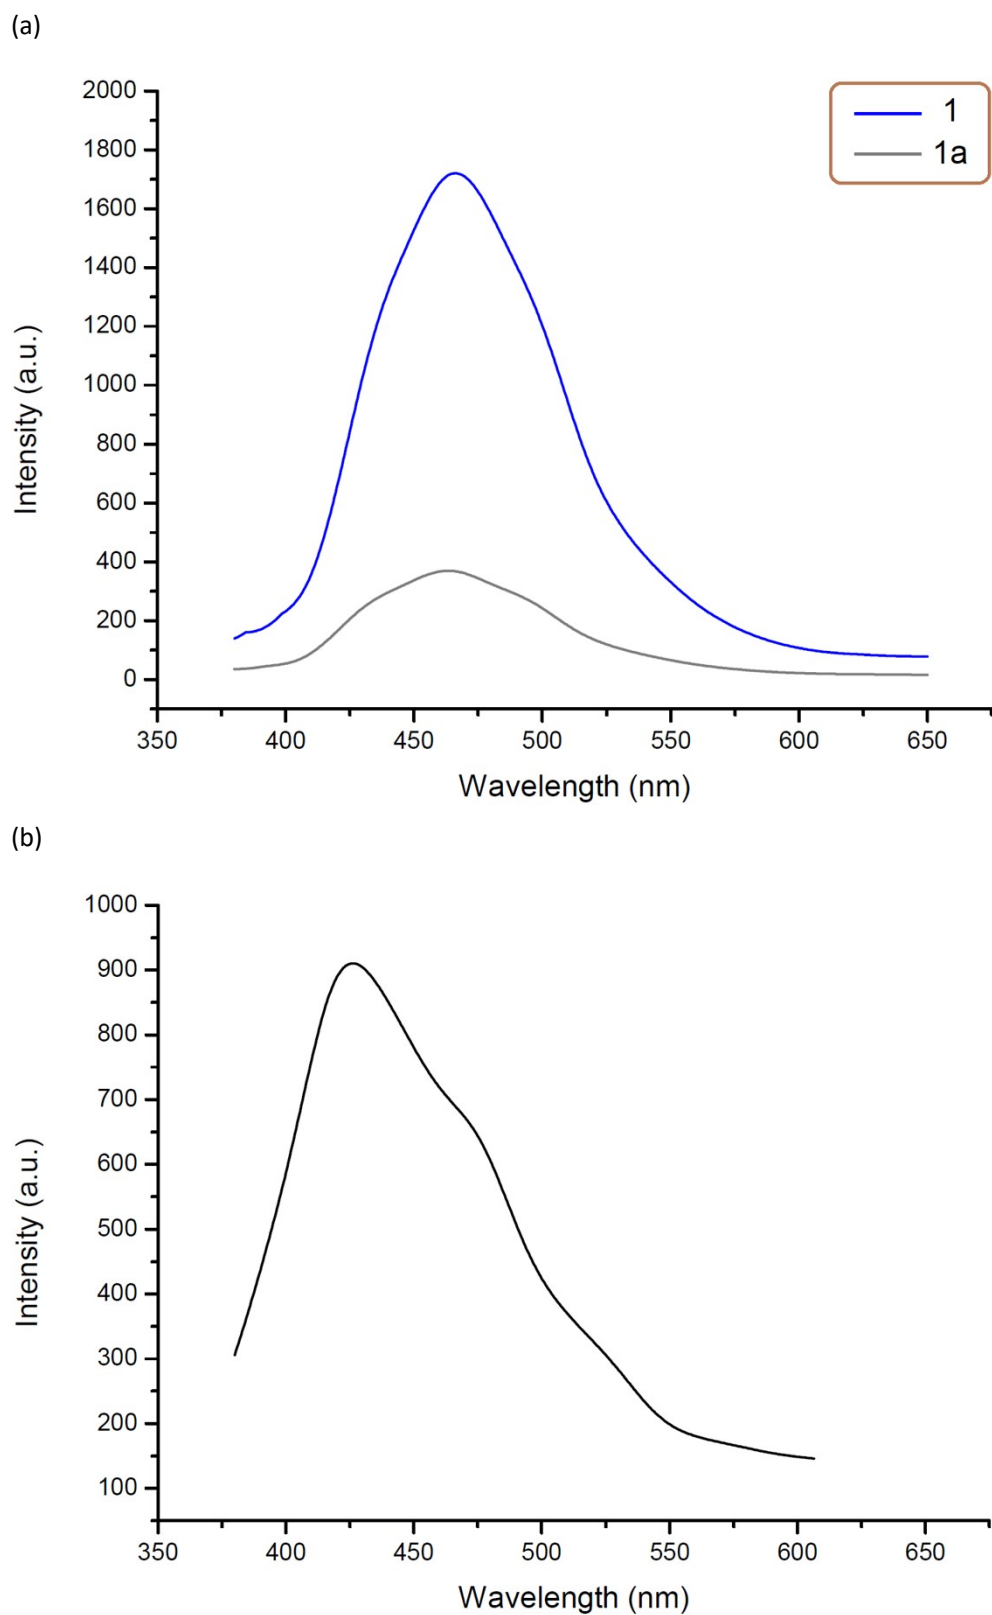

**Fig. S14.** (a) Solid state emission spectra of **1** and **1a** at room temperature. (b) Solid state emission spectrum of 2,3-ppe ligand at room temperature.



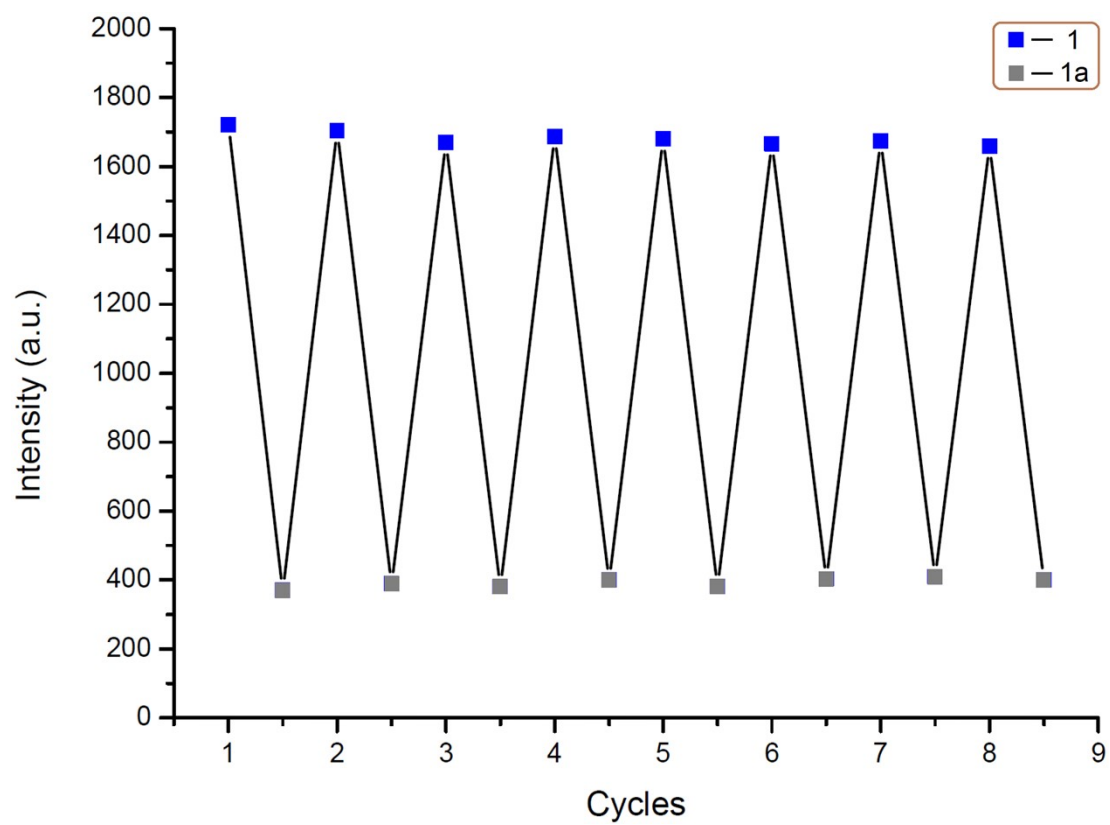

**Fig. S15.** The reaction reversibility for solid state emission spectra of **1**.

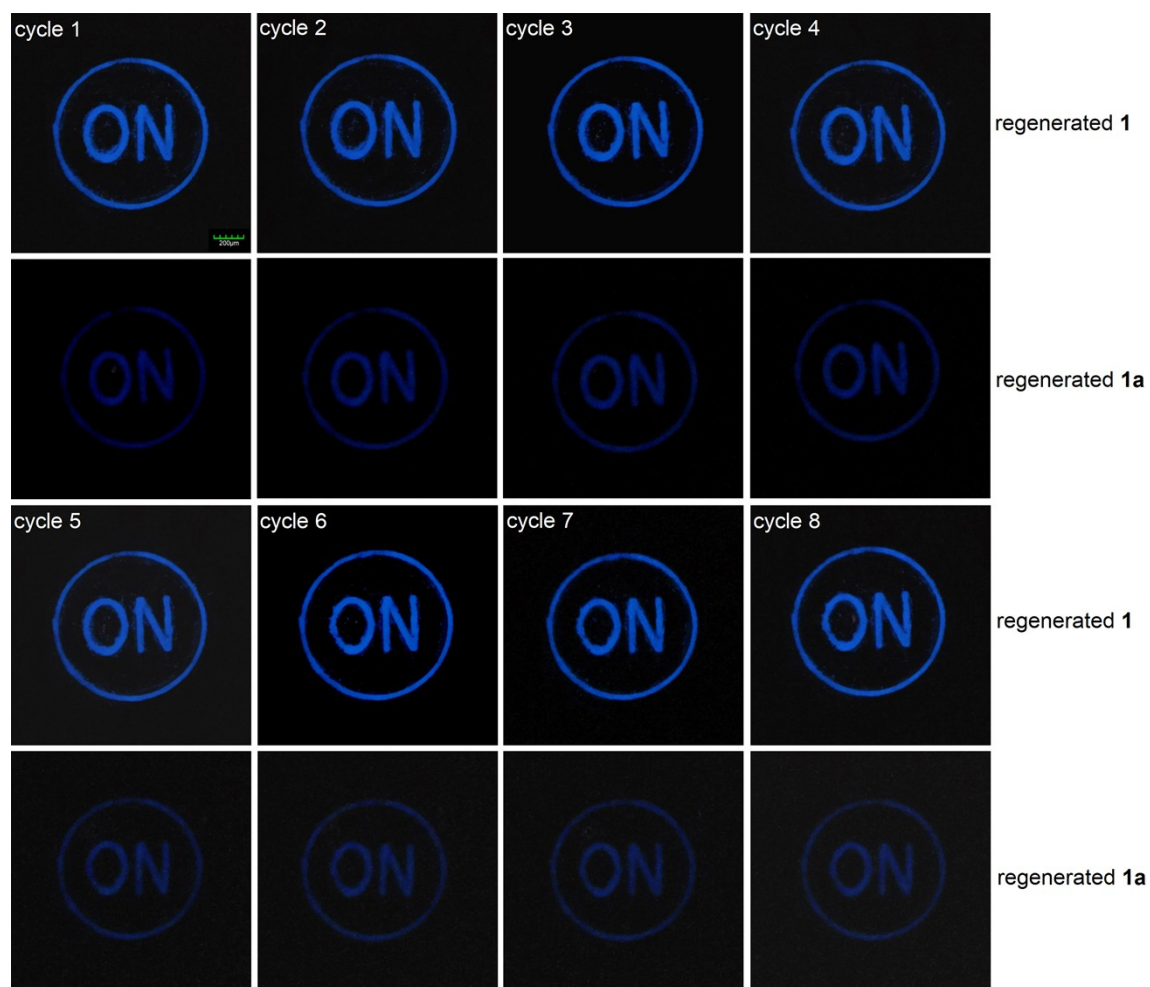

**Fig. S16.** LSCM fluorescence images of a carved pattern with powdered sample of regenerated **1** and **1a** during 8 cycles of reversible photoreaction. All samples were excited at 405 nm with a semiconductor laser.
